# Supplementary material
Source: publisher figshare collection journal article supplement (https://geolsoc.figshare.com/ndownloader/files/29050118)
Supplement: Supplementary file 1 [file 29050118]

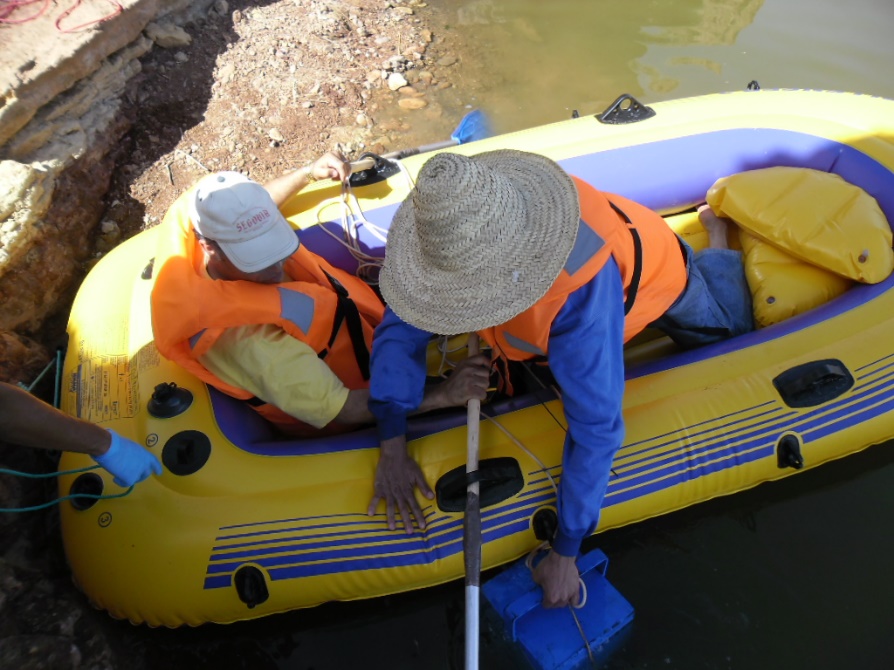


**Figure 9:** Preparing the boat and the merkos to enter in the lake


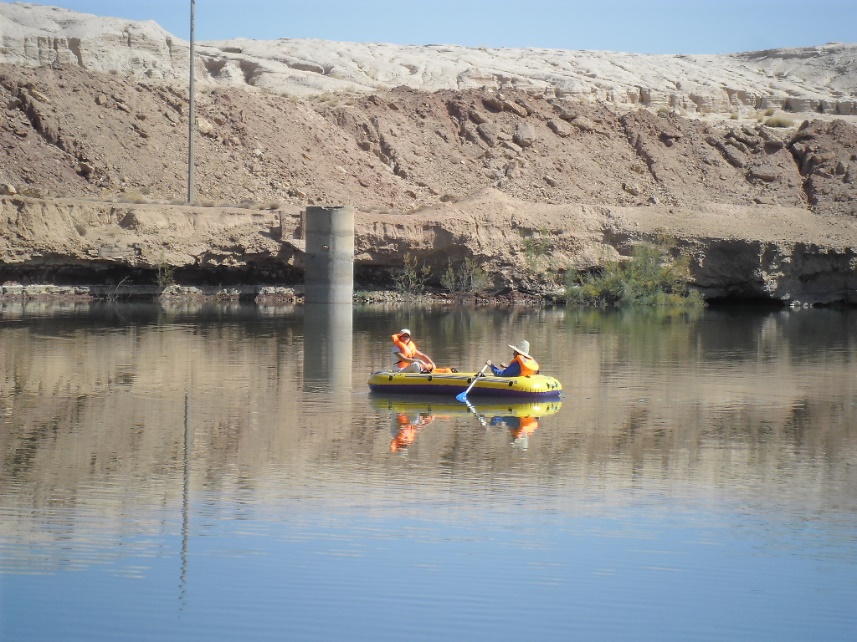


**Figure 10:** Boat in the centre lake


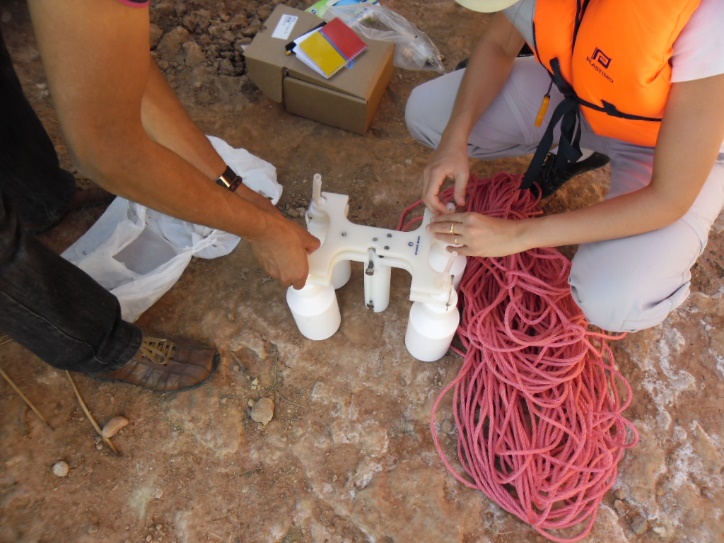


**Figure 11:** preparation of the merkos analyzer


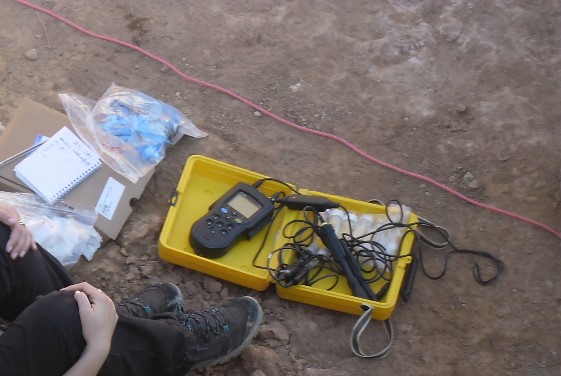


**Figure 12:** HQ40d portable multi-parameter (HACH Co., Loveland, CO, USA)


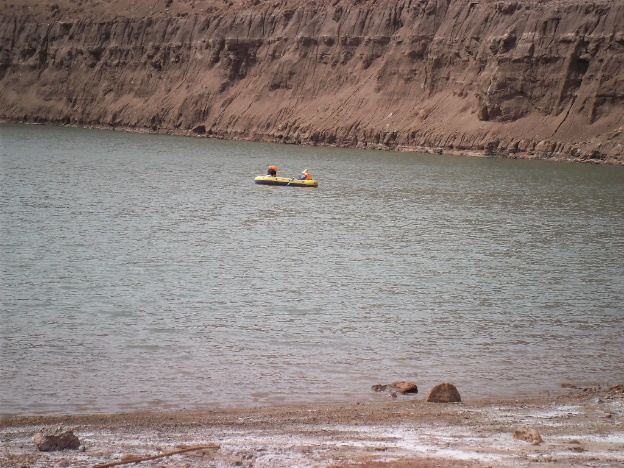


**Figure 13:** General view of the boat on mission in the lake
